# Supplementary material for: In-host population dynamics of Mycobacterium tuberculosis complex during active disease
Source: eLife. 2021 Feb 1;10:e61805. doi: 10.7554/eLife.61805 (PMC7884073; doi:10.7554/eLife.61805)
Supplement: Supplementary file 21. — Legend for antibiotics: INH = isoniazid, RIF = rifampicin, EMB = ethambutol, PZA = pyrazinamide, CAP = capreomycin, PAS = para-aminosalicylic acid, ETH = ethionamide, KAN = kanamycin, AMK = Amikacin, LEVO = levofloxacin, CIP = ciprofloxacin, OFLX = ofloxacin, STR = streptomycin. [file elife-61805-supp21.xlsx]

## Sheet: Table S2B after DR genotyping
Patient ID	Study Source	Run ID	Sample ID	tag	RIF	INH	AMK	CAP	CIP	EMB	ETH	KAN	LEVO	OFLX	PAS	PZA	STR
I0005973-8	Farhat et. al. 2019	MQFF00000000	Peru3062	Peru3062	R	R	S	S	S	S	S	S	S	S	S	S	S
I0005973-8	Farhat et. al. 2019	MQKH00000000	Peru3315	Peru3315	R	R	S	S	S	S	S	S	S	S	S	S	S
I0005229-5	Farhat et. al. 2019	MQAO00000000	Peru2908	Peru2908	R	R	S	S	S	S	S	S	S	S	S	S	S
I0005229-5	Farhat et. al. 2019	MQKD00000000	Peru3278	Peru3278	R	R	S	S	S	S	S	S	S	S	S	S	S
I0005235-2	Farhat et. al. 2019	MQBA00000000	Peru2921	Peru2921	R	R	S	S	R	S	S	S	R	R	S	S	S
I0005235-2	Farhat et. al. 2019	MQKC00000000	Peru3287	Peru3287	R	R	S	S	R	S	S	S	R	R	S	S	S
I0004746-9	Farhat et. al. 2019	MQDD00000000	Peru3001	Peru3001	R	R	S	S	S	S	S	S	S	S	S	S	S
I0004746-9	Farhat et. al. 2019	MLZS00000000	Peru4147	Peru4147	R	R	S	S	S	S	S	S	S	S	S	S	S
I0004304-7	Farhat et. al. 2019	MQEY00000000	Peru3055	Peru3055	S	R	S	S	S	S	S	S	S	S	S	S	R
I0004304-7	Farhat et. al. 2019	MQJA00000000	Peru3379	Peru3379	S	R	S	S	S	R	S	S	S	S	S	S	R
I0004290-8	Farhat et. al. 2019	MQDN00000000	Peru3011	Peru3011	R	R	S	S	S	S	S	S	S	S	S	S	S
I0004290-8	Farhat et. al. 2019	MQIU00000000	Peru3365	Peru3365	R	R	S	S	S	S	S	S	S	S	S	S	S
I0004236-1	Farhat et. al. 2019	MQAV00000000	Peru2915	Peru2915	R	R	S	S	S	S	R	S	S	S	S	S	S
I0004236-1	Farhat et. al. 2019	MMBD00000000	Peru4108	Peru4108	R	R	S	S	S	S	R	S	S	S	S	S	S
I0004240-3	Farhat et. al. 2019	MQCK00000000	Peru2963	Peru2963	S	S	S	S	S	S	S	S	S	S	S	S	S
I0004240-3	Farhat et. al. 2019	MQHZ00000000	Peru3381	Peru3381	R	R	S	S	S	R	S	S	S	S	S	S	S
I0004172-8	Farhat et. al. 2019	MQCX00000000	Peru2976	Peru2976	R	R	S	S	S	S	S	S	S	S	S	S	S
I0004172-8	Farhat et. al. 2019	MQIO00000000	Peru3373	Peru3373	R	R	S	S	S	S	R	S	S	S	S	R	S
I0004003-5	Farhat et. al. 2019	MQAX00000000	Peru2918	Peru2918	R	R	S	S	S	S	S	S	S	S	S	S	S
I0004003-5	Farhat et. al. 2019	MQKO00000000	Peru3408	Peru3408	R	R	S	S	S	S	S	S	S	S	S	S	S
I0004013-4	Farhat et. al. 2019	MQDI00000000	Peru3006	Peru3006	R	R	S	S	S	S	S	S	S	S	S	S	S
I0004013-4	Farhat et. al. 2019	MQMC00000000	Peru3345	Peru3345	R	R	S	S	S	S	S	S	S	S	S	S	S
I0003758-5	Farhat et. al. 2019	MQDB00000000	Peru2980	Peru2980	S	S	S	S	S	S	S	S	S	S	S	S	S
I0003758-5	Farhat et. al. 2019	MMBA00000000	Peru4111	Peru4111	S	S	S	S	S	S	S	S	S	S	S	S	S
I0003710-6	Farhat et. al. 2019	MMBH00000000	Peru4104	Peru4104	S	R	S	S	S	S	S	S	S	S	S	S	S
I0003710-6	Farhat et. al. 2019	MQJB00000000	Peru3370	Peru3370	R	R	S	S	S	S	R	S	S	S	S	R	S
I0003398-0	Farhat et. al. 2019	MQBM00000000	Peru2937	Peru2937	S	R	S	S	S	S	S	S	S	S	S	S	S
I0003398-0	Farhat et. al. 2019	MQHN00000000	Peru3340	Peru3340	S	R	S	S	S	S	S	S	S	S	S	S	S
I0003165-3	Farhat et. al. 2019	MQEU00000000	Peru3048	Peru3048	R	R	S	S	S	S	S	S	S	S	S	S	S
I0003165-3	Farhat et. al. 2019	MQHO00000000	Peru3335	Peru3335	R	R	S	S	S	S	S	S	S	S	S	S	S
I0002960-8	Farhat et. al. 2019	MQCB00000000	Peru2952	Peru2952	R	R	S	S	S	S	S	S	S	S	S	S	S
I0002960-8	Farhat et. al. 2019	MQLQ00000000	Peru3362	Peru3362	R	R	S	S	S	S	S	S	S	S	S	S	S
I0002615-8	Farhat et. al. 2019	MQEH00000000	Peru3032	Peru3032	R	R	S	S	S	S	S	S	S	S	S	S	S
I0002615-8	Farhat et. al. 2019	MMCH00000000	Peru4076	Peru4076	R	R	S	S	S	S	S	S	S	S	S	S	S
I0002457-5	Farhat et. al. 2019	MQCF00000000	Peru2956	Peru2956	R	R	S	S	S	S	S	S	S	S	S	S	S
I0002457-5	Farhat et. al. 2019	MMCN00000000	Peru4070	Peru4070	R	R	S	S	S	S	S	S	S	S	S	S	S
I0002074-8	Farhat et. al. 2019	MQBI00000000	Peru2931	Peru2931	R	R	S	S	S	S	S	S	S	S	S	S	S
I0002074-8	Farhat et. al. 2019	MQGM00000000	Peru3384	Peru3384	R	R	S	S	S	S	R	S	S	S	S	R	S
I0001560-7	Farhat et. al. 2019	MQEG00000000	Peru3031	Peru3031	R	R	S	S	S	S	S	S	S	S	S	S	S
I0001560-7	Farhat et. al. 2019	MQGL00000000	Peru3342	Peru3342	R	R	S	S	S	S	S	S	S	S	S	S	S
I0001485-7	Farhat et. al. 2019	MQBH00000000	Peru2928	Peru2928	R	R	S	S	S	S	R	S	S	S	S	R	S
I0001485-7	Farhat et. al. 2019	MMDN00000000	Peru4044	Peru4044	R	R	S	S	S	S	S	S	S	S	S	S	S
I0001162-2	Farhat et. al. 2019	MQEZ00000000	Peru3056	Peru3056	R	R	S	S	S	S	S	S	S	S	S	S	S
I0001162-2	Farhat et. al. 2019	MQFZ00000000	Peru3405	Peru3405	R	R	S	S	S	S	S	S	S	S	S	S	S
I0001031-9	Farhat et. al. 2019	MQCR00000000	Peru2970	Peru2970	R	R	S	S	S	R	S	S	S	S	S	S	S
I0001031-9	Farhat et. al. 2019	CP018304	Peru3377	Peru3377	R	R	S	S	S	S	R	S	S	S	S	R	S
I0001112-7	Farhat et. al. 2019	MQCP00000000	Peru2968	Peru2968	R	R	S	S	S	S	S	S	S	S	S	S	R
I0001112-7	Farhat et. al. 2019	MQLP00000000	Peru3430	Peru3430	R	R	S	S	S	S	S	S	S	S	S	S	R
I0000221-7	Farhat et. al. 2019	MQLO00000000	Peru3312	Peru3312	S	R	S	S	S	S	R	S	S	S	S	S	S
I0000221-7	Farhat et. al. 2019	MQFV00000000	Peru3424	Peru3424	R	R	S	S	S	S	S	S	S	S	S	S	S
I0000024-5	Farhat et. al. 2019	MQCY00000000	Peru2977	Peru2977	R	R	S	S	S	R	S	S	S	S	S	S	S
I0000024-5	Farhat et. al. 2019	MQLI00000000	Peru3403	Peru3403	R	R	S	S	S	R	S	S	S	S	S	S	S
I0000068-2	Farhat et. al. 2019	MQCG00000000	Peru2959	Peru2959	R	R	S	S	S	S	S	S	S	S	S	S	S
I0000068-2	Farhat et. al. 2019	MQKS00000000	Peru3367	Peru3367	R	R	S	S	S	S	S	S	S	S	S	S	S
I0000180-5	Farhat et. al. 2019	MQKU00000000	Peru3416	Peru3416	R	R	S	S	S	S	S	S	S	S	S	S	S
I0000180-5	Farhat et. al. 2019	MQKZ00000000	Peru3351	Peru3351	R	R	S	S	S	S	S	S	S	S	S	S	S
1620	Farhat et. al. 2019	MMVG00000000	Peru5021	Peru5021	R	R	S	S	S	S	R	S	S	S	S	S	S
1620	Farhat et. al. 2019	MMUN00000000	Peru4516	Peru4516	R	R	S	S	S	S	S	S	S	S	S	S	S
1646	Farhat et. al. 2019	MMUG00000000	Peru4523	Peru4523	R	R	S	S	S	S	R	S	S	S	S	S	S
1646	Farhat et. al. 2019	MMVC00000000	Peru5025	Peru5025	R	R	S	S	S	R	R	S	S	S	S	S	S
1657	Farhat et. al. 2019	MMUC00000000	Peru4527	Peru4527	R	R	S	S	S	S	S	S	S	S	S	S	R
1657	Farhat et. al. 2019	MMUB00000000	Peru4528	Peru4528	S	S	S	S	S	S	S	S	S	S	S	S	S
1664	Farhat et. al. 2019	MMTX00000000	Peru4532	Peru4532	R	R	S	S	S	S	S	S	S	S	S	R	S
1664	Farhat et. al. 2019	MMJJ00000000	Peru5106	Peru5106	R	R	S	S	S	S	S	S	S	S	S	R	S
1667	Farhat et. al. 2019	MMTW00000000	Peru4533	Peru4533	R	R	S	S	S	S	S	S	S	S	S	S	S
1667	Farhat et. al. 2019	MMVB00000000	Peru5026	Peru5026	R	R	S	S	S	S	S	S	S	S	S	S	S
1669	Farhat et. al. 2019	MMVA00000000	Peru5027	Peru5027	R	R	S	S	S	S	S	S	S	S	S	S	S
1669	Farhat et. al. 2019	MMTV00000000	Peru4534	Peru4534	R	R	S	S	S	S	S	S	S	S	S	S	S
1671	Farhat et. al. 2019	MMTU00000000	Peru4535	Peru4535	R	R	S	S	S	R	S	S	S	S	S	S	S
1671	Farhat et. al. 2019	MMUZ00000000	Peru5028	Peru5028	S	R	S	S	S	S	S	S	S	S	S	S	S
1672	Farhat et. al. 2019	MMUX00000000	Peru5030	Peru5030	R	R	S	S	S	S	S	S	S	S	S	S	S
1672	Farhat et. al. 2019	MMUW00000000	Peru5031	Peru5031	R	R	S	S	S	S	S	S	S	S	S	S	S
1673	Farhat et. al. 2019		Peru5451	Peru5451	R	R	S	S	S	S	S	S	S	S	S	S	S
1673	Farhat et. al. 2019		Peru5452	Peru5452	R	R	S	S	S	S	S	S	S	S	S	S	S
1674	Farhat et. al. 2019	MMTR00000000	Peru4538	Peru4538	R	R	S	S	S	R	R	S	S	S	S	S	S
1674	Farhat et. al. 2019	MMUS00000000	Peru5035	Peru5035	R	R	S	S	S	S	S	S	S	S	S	S	S
1678	Farhat et. al. 2019	MMUR00000000	Peru5036	Peru5036	R	R	S	S	S	S	S	S	S	S	S	S	S
1678	Farhat et. al. 2019	MMUQ00000000	Peru5037	Peru5037	S	S	S	S	S	S	S	S	S	S	S	S	S
1682	Farhat et. al. 2019	MMPS00000000	Peru4652	Peru4652	R	R	S	S	S	S	S	S	S	S	S	S	S
1682	Farhat et. al. 2019	MMUP00000000	Peru5038	Peru5038	R	R	S	S	S	R	S	S	S	S	S	S	S
1687	Farhat et. al. 2019	MMPP00000000	Peru4655	Peru4655	R	R	S	S	S	S	S	S	S	S	S	S	S
1687	Farhat et. al. 2019	MMJI00000000	Peru5107	Peru5107	R	R	S	S	S	S	S	S	S	S	S	S	S
1700	Farhat et. al. 2019	MMPM00000000	Peru4658	Peru4658	R	R	S	S	S	S	S	S	S	S	S	S	S
1700	Farhat et. al. 2019	MMJH00000000	Peru5108	Peru5108	R	R	S	S	S	S	S	S	S	S	S	S	S
1719	Farhat et. al. 2019	MMJF00000000	Peru5110	Peru5110	R	R	S	S	S	R	S	S	S	S	S	S	R
1719	Farhat et. al. 2019	MMKZ00000000	Peru4307	Peru4307	R	R	S	S	S	R	S	S	S	S	S	S	R
1827	Farhat et. al. 2019	MMJE00000000	Peru5111	Peru5111	S	R	S	S	S	S	S	S	S	S	S	S	S
1827	Farhat et. al. 2019	MMPJ00000000	Peru4661	Peru4661	S	R	S	S	S	S	S	S	S	S	S	S	S
1846	Farhat et. al. 2019	MMJD00000000	Peru5112	Peru5112	R	R	S	S	S	R	S	S	S	S	S	S	S
1846	Farhat et. al. 2019	MMLG00000000	Peru4322	Peru4322	R	R	S	S	S	R	S	S	S	S	S	S	S
1941	Farhat et. al. 2019	MMJC00000000	Peru5113	Peru5113	R	R	S	S	S	S	S	S	S	S	S	S	S
1941	Farhat et. al. 2019	MMPF00000000	Peru4665	Peru4665	R	R	S	S	S	S	S	S	S	S	S	S	S
1948	Farhat et. al. 2019	MMPY00000000	Peru4646	Peru4646	R	R	S	S	S	S	S	S	S	S	S	S	S
1948	Farhat et. al. 2019	MMJB00000000	Peru5114	Peru5114	R	R	S	S	S	S	S	S	S	S	S	S	S
1960	Farhat et. al. 2019	MMJA00000000	Peru5115	Peru5115	R	R	S	S	S	S	S	S	S	S	S	S	S
1960	Farhat et. al. 2019	MMPC00000000	Peru4668	Peru4668	R	R	S	S	S	S	S	S	S	S	S	S	S
1972	Farhat et. al. 2019	MRFP00000000	Peru5454	Peru5454	S	R	S	S	S	R	R	S	S	S	S	R	S
1972	Farhat et. al. 2019	MMKT00000000	Peru5070	Peru5070	S	R	S	S	S	R	R	S	S	S	S	R	S
2026	Farhat et. al. 2019	MMOU00000000	Peru4676	Peru4676	R	R	S	S	S	S	S	S	S	S	S	S	S
2026	Farhat et. al. 2019	MMIY00000000	Peru5117	Peru5117	R	R	S	S	S	S	S	S	S	S	S	S	S
2049	Farhat et. al. 2019	MMIX00000000	Peru5118	Peru5118	R	R	S	S	S	S	S	S	S	S	S	S	R
2049	Farhat et. al. 2019	MMOS00000000	Peru4678	Peru4678	R	R	S	S	S	S	S	S	S	S	S	S	R
2307	Farhat et. al. 2019	MMOK00000000	Peru4686	Peru4686	R	R	S	S	S	S	S	S	S	S	S	S	S
2307	Farhat et. al. 2019	MMIW00000000	Peru5119	Peru5119	R	R	S	S	S	S	S	S	S	S	S	S	S
2319	Farhat et. al. 2019	MMOG00000000	Peru4690	Peru4690	R	R	S	S	S	S	S	S	S	S	S	S	S
2319	Farhat et. al. 2019	MMIV00000000	Peru5120	Peru5120	R	R	S	S	R	S	S	S	R	R	S	S	S
2321	Farhat et. al. 2019	MMHR00000000	Peru4692	Peru4692	S	R	S	S	S	S	S	S	S	S	S	S	S
2321	Farhat et. al. 2019	MMIU00000000	Peru5121	Peru5121	S	R	S	S	S	S	S	S	S	S	S	S	S
2436	Farhat et. al. 2019	MMHC00000000	Peru4713	Peru4713	R	R	S	S	S	S	S	S	S	S	S	S	S
2436	Farhat et. al. 2019	MMIS00000000	Peru5123	Peru5123	R	R	S	S	S	S	S	S	S	S	S	S	S
2459	Farhat et. al. 2019	MMYC00000000	Peru4946	Peru4946	S	R	S	S	S	S	R	S	S	S	S	S	S
2459	Farhat et. al. 2019	MMIR00000000	Peru5124	Peru5124	S	R	S	S	S	S	R	S	S	S	S	S	S
2491	Farhat et. al. 2019	MMZT00000000	Peru4903	Peru4903	R	R	S	S	S	S	S	S	S	S	S	S	S
2491	Farhat et. al. 2019	MMIO00000000	Peru5127	Peru5127	R	R	S	S	S	S	S	S	S	S	S	S	S
2492	Farhat et. al. 2019	MMKR00000000	Peru5072	Peru5072	S	S	S	S	S	S	S	S	S	S	S	S	S
2492	Farhat et. al. 2019	MMIN00000000	Peru5128	Peru5128	R	S	S	S	S	S	S	S	S	S	S	R	S
2511	Farhat et. al. 2019	MMZR00000000	Peru4905	Peru4905	S	R	S	S	S	S	S	S	S	S	S	S	S
2511	Farhat et. al. 2019	MMIM00000000	Peru5129	Peru5129	S	R	S	S	S	S	S	S	S	S	S	S	S
2523	Farhat et. al. 2019	MMIL00000000	Peru5130	Peru5130	S	R	S	S	S	S	S	S	S	S	S	S	S
2523	Farhat et. al. 2019	MMZP00000000	Peru4907	Peru4907	S	R	S	S	S	S	S	S	S	S	S	S	S
2556	Farhat et. al. 2019	MMGT00000000	Peru4722	Peru4722	R	R	S	S	S	S	S	S	S	S	S	S	S
2556	Farhat et. al. 2019	MMIJ00000000	Peru5132	Peru5132	R	R	S	S	S	S	S	S	S	S	S	S	S
2688	Farhat et. al. 2019	MMZG00000000	Peru4916	Peru4916	R	R	S	S	S	S	R	S	S	S	S	R	S
2688	Farhat et. al. 2019	MMII00000000	Peru5133	Peru5133	R	R	S	S	S	S	R	S	S	S	S	R	S
2718	Farhat et. al. 2019	MRDO00000000	Peru5134	Peru5134	R	R	S	S	S	S	S	S	S	S	S	S	S
2718	Farhat et. al. 2019	MMGA00000000	Peru4741	Peru4741	R	R	S	S	S	S	S	S	S	S	S	S	S
2731	Farhat et. al. 2019	MRFQ00000000	Peru5455	Peru5455	S	R	S	S	S	S	R	S	S	S	S	S	S
2731	Farhat et. al. 2019	MREW00000000	Peru5435	Peru5435	S	R	S	S	S	S	R	S	S	S	S	S	S
2741	Farhat et. al. 2019	MMYY00000000	Peru4924	Peru4924	R	R	S	S	S	S	S	S	S	S	S	S	S
2741	Farhat et. al. 2019	MRDP00000000	Peru5135	Peru5135	R	R	S	S	S	S	S	S	S	S	S	S	S
2776	Farhat et. al. 2019	MMYV00000000	Peru4927	Peru4927	R	R	S	S	S	S	R	S	S	S	S	S	S
2776	Farhat et. al. 2019	MRDQ00000000	Peru5136	Peru5136	R	R	S	S	S	S	R	S	S	S	S	S	S
2803	Farhat et. al. 2019	MMYU00000000	Peru4928	Peru4928	R	R	S	S	S	R	S	S	S	S	S	S	S
2803	Farhat et. al. 2019	MRDR00000000	Peru5137	Peru5137	R	R	S	S	S	S	S	S	S	S	S	S	S
2918	Farhat et. al. 2019	MMYK00000000	Peru4938	Peru4938	R	R	S	S	S	S	S	S	S	S	S	S	S
2918	Farhat et. al. 2019	MRDS00000000	Peru5138	Peru5138	R	R	S	S	S	S	S	S	S	S	S	S	S
2968	Farhat et. al. 2019		Peru5139	Peru5139	R	R	S	S	S	R	S	S	S	S	S	S	S
2968	Farhat et. al. 2019		Peru5140	Peru5140	R	R	S	S	S	R	S	S	S	S	S	S	S
3096	Farhat et. al. 2019	MMXM00000000	Peru4962	Peru4962	S	R	S	S	S	S	S	S	S	S	S	S	S
3096	Farhat et. al. 2019	MMIH00000000	Peru5141	Peru5141	S	R	S	S	S	S	S	S	S	S	S	S	S
3140	Farhat et. al. 2019	MMXJ00000000	Peru4965	Peru4965	R	R	S	S	S	S	R	S	S	S	S	S	S
3140	Farhat et. al. 2019	MMIG00000000	Peru5142	Peru5142	R	R	S	S	S	S	R	S	S	S	S	S	S
3145	Farhat et. al. 2019	MMXH00000000	Peru4967	Peru4967	R	R	S	S	R	S	S	S	R	R	S	S	R
3145	Farhat et. al. 2019	MMIF00000000	Peru5143	Peru5143	R	R	S	S	R	R	S	S	R	R	S	S	R
3430	Farhat et. al. 2019	MMKB00000000	Peru5088	Peru5088	R	R	S	S	S	R	R	S	S	S	S	S	S
3430	Farhat et. al. 2019	MMID00000000	Peru5146	Peru5146	R	S	S	S	S	S	S	S	S	S	S	S	S
3439	Farhat et. al. 2019	MMJZ00000000	Peru5090	Peru5090	R	S	S	S	S	S	S	S	S	S	S	S	S
3439	Farhat et. al. 2019	MMIC00000000	Peru5147	Peru5147	R	R	S	S	S	R	R	S	S	S	S	S	S
3443	Farhat et. al. 2019	MMIB00000000	Peru5148	Peru5148	R	R	S	S	S	S	S	S	S	S	S	S	S
3443	Farhat et. al. 2019	MMXA00000000	Peru4974	Peru4974	R	R	S	S	S	S	S	S	S	S	S	S	S
3451	Farhat et. al. 2019	MMIA00000000	Peru5149	Peru5149	R	R	S	S	S	S	S	S	S	S	S	S	S
3451	Farhat et. al. 2019	MMHZ00000000	Peru5150	Peru5150	R	R	S	S	S	S	S	S	S	S	S	S	S
3641	Farhat et. al. 2019	MMTN00000000	Peru4542	Peru4542	R	R	S	S	S	S	S	S	S	S	S	S	S
3641	Farhat et. al. 2019	MMHY00000000	Peru5151	Peru5151	R	R	S	S	S	S	S	S	S	S	S	S	S
3673	Farhat et. al. 2019	MMTH00000000	Peru4548	Peru4548	R	R	S	S	S	S	R	S	S	S	S	R	S
3673	Farhat et. al. 2019	MMHX00000000	Peru5152	Peru5152	R	R	S	S	S	S	R	S	S	S	S	R	S
3725	Farhat et. al. 2019	MMTC00000000	Peru4553	Peru4553	R	R	S	S	S	S	S	S	S	S	S	S	S
3725	Farhat et. al. 2019	MMHW00000000	Peru5153	Peru5153	R	R	S	S	R	R	S	S	R	R	S	S	S
P043	Casali et. al. 2016	ERR369609	ERS327701	ERR369609	S	R	S	S	S	S	R	S	S	S	S	S	S
P043	Casali et. al. 2016	ERR369612	ERS327704	ERR369612	S	R	S	S	S	S	R	S	S	S	S	S	S
P052	Casali et. al. 2016	ERR369616	ERS327708	ERR369616	S	R	S	S	S	S	R	S	S	S	S	S	S
P052	Casali et. al. 2016	ERR369656	ERS327748	ERR369656	R	R	S	S	S	S	R	S	S	S	S	S	S
P062	Casali et. al. 2016	ERR369621	ERS327713	ERR369621	S	R	S	S	S	S	R	S	S	S	S	S	S
P062	Casali et. al. 2016	ERR502246	ERS399963	ERR502246	S	R	S	S	S	S	R	S	S	S	S	S	S
P108	Casali et. al. 2016	ERR502262	ERS399979	ERR502262	S	R	S	S	S	S	R	S	S	S	S	S	S
P108	Casali et. al. 2016	ERR600640	ERS456698	ERR600640	S	R	S	S	S	S	R	S	S	S	S	S	S
P160	Casali et. al. 2016	ERR369659	ERS327751	ERR369659	S	R	S	S	S	S	R	S	S	S	S	S	S
P160	Casali et. al. 2016	ERR502278	ERS399995	ERR502278	S	R	S	S	S	S	R	S	S	S	S	S	S
P164	Casali et. al. 2016	ERR600655	ERS456713	ERR600655	S	R	S	S	S	S	R	S	S	S	S	S	S
P164	Casali et. al. 2016	ERR502299	ERS400016	ERR502299	S	R	S	S	S	S	R	S	S	S	S	S	S
P179	Casali et. al. 2016	ERR502282	ERS399999	ERR502282	S	R	S	S	S	S	R	S	S	S	S	S	S
P179	Casali et. al. 2016	ERR369670	ERS327762	ERR369670	S	R	S	S	S	S	R	S	S	S	S	S	S
P221	Casali et. al. 2016	ERR502300	ERS400017	ERR502300	S	R	S	S	S	S	R	S	S	S	S	S	S
P221	Casali et. al. 2016	ERR502308	ERS400025	ERR502308	S	R	S	S	S	S	R	S	S	S	S	S	S
P227	Casali et. al. 2016	ERR369693	ERS327785	ERR369693	S	R	S	S	S	S	R	S	S	S	S	S	S
P227	Casali et. al. 2016	ERR502363	ERS400080	ERR502363	S	R	S	S	S	S	R	S	S	S	S	S	S
P233	Casali et. al. 2016	ERR502307	ERS400024	ERR502307	S	R	S	S	S	S	R	S	S	S	S	S	S
P233	Casali et. al. 2016	ERR502360	ERS400077	ERR502360	S	R	S	S	S	S	R	S	S	S	S	S	S
P251	Casali et. al. 2016	ERR369703	ERS327795	ERR369703	S	R	S	S	S	S	R	S	S	S	S	S	S
P251	Casali et. al. 2016	ERR600658	ERS456716	ERR600658	S	R	S	S	S	S	R	S	S	S	S	S	S
P288	Casali et. al. 2016	ERR502333	ERS400050	ERR502333	S	R	S	S	S	S	R	S	S	S	S	S	S
P288	Casali et. al. 2016	ERR502366	ERS400083	ERR502366	S	R	S	S	S	S	R	S	S	S	S	S	S
P305	Casali et. al. 2016	ERR502347	ERS400064	ERR502347	S	R	S	S	S	S	R	S	S	S	S	S	S
P305	Casali et. al. 2016	ERR600659	ERS456717	ERR600659	S	R	S	S	S	S	R	S	S	S	S	S	S
P316	Casali et. al. 2016	ERR502356	ERS400073	ERR502356	R	R	S	S	S	S	R	S	S	S	S	S	S
P316	Casali et. al. 2016	ERR369756	ERS327848	ERR369756	R	R	S	S	S	S	R	S	S	S	S	S	S
P318	Casali et. al. 2016	ERR502358	ERS400075	ERR502358	S	R	S	S	S	S	R	S	S	S	S	S	S
P318	Casali et. al. 2016	ERR502359	ERS400076	ERR502359	S	R	S	S	S	S	R	S	S	S	S	S	S
P355	Casali et. al. 2016	ERR502394	ERS400111	ERR502394	S	R	S	S	S	S	R	S	S	S	S	S	S
P355	Casali et. al. 2016	ERR369739	ERS327831	ERR369739	S	R	S	S	S	S	R	S	S	S	S	S	S
P367	Casali et. al. 2016	ERR369721	ERS327813	ERR369721	R	R	S	S	S	S	R	S	S	S	S	S	S
P367	Casali et. al. 2016	ERR502404	ERS400121	ERR502404	R	R	S	S	S	S	R	S	S	S	S	S	S
P372	Casali et. al. 2016	ERR369725	ERS327817	ERR369725	S	R	S	S	S	S	R	S	S	S	S	S	S
P372	Casali et. al. 2016	ERR502405	ERS400122	ERR502405	S	R	S	S	S	S	R	S	S	S	S	S	S
P377	Casali et. al. 2016	ERR369729	ERS327821	ERR369729	S	R	S	S	S	S	R	S	S	S	S	S	S
P377	Casali et. al. 2016	ERR502407	ERS400124	ERR502407	S	R	S	S	S	S	R	S	S	S	S	S	S
P000128	Walker et. al. 2013	ERR039325		ERR039325	S	S	S	S	S	S	S	S	S	S	S	S	S
P000128	Walker et. al. 2013	ERR046906		ERR046906	S	S	S	S	S	S	S	S	S	S	S	S	S
P000183	Walker et. al. 2013	ERR039337		ERR039337	S	S	S	S	S	S	S	S	S	S	S	S	S
P000183	Walker et. al. 2013	ERR039338		ERR039338	S	S	S	S	S	S	S	S	S	S	S	S	S
P000320	Walker et. al. 2013	ERR072089		ERR072089	S	S	S	S	S	S	S	S	S	S	S	S	S
P000320	Walker et. al. 2013	ERR072090		ERR072090	S	S	S	S	S	S	S	S	S	S	S	S	S
P000189	Walker et. al. 2013	ERR046779		ERR046779	S	S	S	S	S	S	S	S	S	S	S	S	S
P000189	Walker et. al. 2013	ERR046780		ERR046780	S	S	S	S	S	S	S	S	S	S	S	S	S
P000089	Walker et. al. 2013	ERR039346		ERR039346	S	S	S	S	S	S	S	S	S	S	S	S	S
P000089	Walker et. al. 2013	ERR046904		ERR046904	S	S	S	S	S	S	S	S	S	S	S	S	S
P000267	Walker et. al. 2013	ERR047007		ERR047007	S	R	S	S	S	S	S	S	S	S	S	S	S
P000267	Walker et. al. 2013	ERR072030		ERR072030	S	R	S	S	S	S	S	S	S	S	S	S	S
P000048	Walker et. al. 2013	ERR046948		ERR046948	S	S	S	S	S	S	S	S	S	S	S	S	S
P000048	Walker et. al. 2013	ERR046929		ERR046929	S	S	S	S	S	S	S	S	S	S	S	S	S
P000263	Walker et. al. 2013	ERR047009		ERR047009	S	S	S	S	S	S	S	S	S	S	S	S	S
P000263	Walker et. al. 2013	ERR046998		ERR046998	S	S	S	S	S	S	S	S	S	S	S	S	S
P000027	Walker et. al. 2013	ERR038298		ERR038298	S	S	S	S	S	S	S	S	S	S	S	S	S
P000027	Walker et. al. 2013	ERR046769		ERR046769	S	S	S	S	S	S	S	S	S	S	S	S	S
P000026	Walker et. al. 2013	ERR040087		ERR040087	S	S	S	S	S	S	S	S	S	S	S	S	S
P000026	Walker et. al. 2013	ERR046770		ERR046770	S	S	S	S	S	S	S	S	S	S	S	S	S
P000227	Walker et. al. 2013	ERR046791		ERR046791	S	S	S	S	S	S	S	S	S	S	S	S	S
P000227	Walker et. al. 2013	ERR046913		ERR046913	R	R	S	S	R	S	S	S	R	R	S	S	S
P000226	Walker et. al. 2013	ERR046800		ERR046800	R	R	S	S	R	S	S	S	R	R	S	S	S
P000226	Walker et. al. 2013	ERR046790		ERR046790	R	R	S	S	R	S	S	S	R	R	S	S	S
P000225	Walker et. al. 2013	ERR038294		ERR038294	R	R	S	S	R	S	S	S	R	R	S	S	S
P000225	Walker et. al. 2013	ERR046795		ERR046795	R	R	S	S	R	S	S	S	R	R	S	S	S
P000271	Walker et. al. 2013	ERR072029		ERR072029	S	S	S	S	S	S	S	S	S	S	S	S	S
P000271	Walker et. al. 2013	ERR072025		ERR072025	S	S	S	S	S	S	S	S	S	S	S	S	S
P000273	Walker et. al. 2013	ERR072032		ERR072032	S	S	S	S	S	S	S	S	S	S	S	S	S
P000273	Walker et. al. 2013	ERR072031		ERR072031	S	S	S	S	S	S	S	S	S	S	S	S	S
P000156	Walker et. al. 2013	ERR025846		ERR025846	S	S	S	S	S	S	S	S	S	S	S	S	S
P000156	Walker et. al. 2013	ERR046922		ERR046922	S	S	S	S	S	S	S	S	S	S	S	S	S
P000155	Walker et. al. 2013	ERR046821		ERR046821	R	R	S	S	S	S	S	S	S	S	S	S	S
P000155	Walker et. al. 2013	ERR046796		ERR046796	R	R	S	S	S	S	S	S	S	S	S	S	S
P000071	Walker et. al. 2013	ERR046986		ERR046986	S	S	S	S	S	S	S	S	S	S	S	S	S
P000071	Walker et. al. 2013	ERR046825		ERR046825	S	S	S	S	S	S	S	S	S	S	S	S	S
P000076	Walker et. al. 2013	ERR039323		ERR039323	S	S	S	S	S	S	S	S	S	S	S	S	S
P000076	Walker et. al. 2013	ERR046914		ERR046914	S	S	S	S	S	S	S	S	S	S	S	S	S
P000075	Walker et. al. 2013	ERR046776		ERR046776	S	S	S	S	S	S	S	S	S	S	S	S	S
P000075	Walker et. al. 2013	ERR046778		ERR046778	S	S	S	S	S	S	S	S	S	S	S	S	S
P000094	Walker et. al. 2013	ERR046939		ERR046939	S	S	S	S	S	S	S	S	S	S	S	S	S
P000094	Walker et. al. 2013	ERR046730		ERR046730	S	S	S	S	S	S	S	S	S	S	S	S	S
P000095	Walker et. al. 2013	ERR046852		ERR046852	S	S	S	S	S	S	S	S	S	S	S	S	S
P000095	Walker et. al. 2013	ERR046853		ERR046853	S	S	S	S	S	S	S	S	S	S	S	S	S
P000059	Walker et. al. 2013	ERR046918		ERR046918	S	S	S	S	S	S	S	S	S	S	S	S	S
P000059	Walker et. al. 2013	ERR046933		ERR046933	R	R	S	S	S	S	S	S	S	S	S	S	S
P000276	Walker et. al. 2013	ERR072037		ERR072037	S	S	S	S	S	S	S	S	S	S	S	S	S
P000276	Walker et. al. 2013	ERR047013		ERR047013	S	S	S	S	S	S	S	S	S	S	S	S	S
P000056	Walker et. al. 2013	ERR046907		ERR046907	S	S	S	S	S	S	S	S	S	S	S	S	S
P000056	Walker et. al. 2013	ERR046905		ERR046905	S	S	S	S	S	S	S	S	S	S	S	S	S
P000272	Walker et. al. 2013	ERR072026		ERR072026	S	S	S	S	S	S	S	S	S	S	S	S	S
P000272	Walker et. al. 2013	ERR072040		ERR072040	S	S	S	S	S	S	S	S	S	S	S	S	S
P000259	Walker et. al. 2013	ERR047010		ERR047010	S	S	S	S	S	S	S	S	S	S	S	S	S
P000259	Walker et. al. 2013	ERR047012		ERR047012	S	S	S	S	S	S	S	S	S	S	S	S	S
P000035	Walker et. al. 2013	ERR046783		ERR046783	S	S	S	S	S	S	S	S	S	S	S	S	S
P000035	Walker et. al. 2013	ERR072072		ERR072072	S	S	S	S	S	S	S	S	S	S	S	S	S
P000176	Walker et. al. 2013	ERR046798		ERR046798	S	S	S	S	S	S	S	S	S	S	S	S	S
P000176	Walker et. al. 2013	ERR046799		ERR046799	S	S	S	S	S	S	S	S	S	S	S	S	S
P000030	Walker et. al. 2013	ERR025847		ERR025847	S	S	S	S	S	S	S	S	S	S	S	S	S
P000030	Walker et. al. 2013	ERR039344		ERR039344	S	S	S	S	S	S	S	S	S	S	S	S	S
P01	Trauner et. al. 2017	ERR1352298	SAMEA3920963	ERR1352298	S	S	S	S	S	S	S	S	S	S	S	S	S
P01	Trauner et. al. 2017	ERR1352301	SAMEA3920966	ERR1352301	S	S	S	S	S	S	S	S	S	S	S	S	S
P02	Trauner et. al. 2017	ERR1352303	SAMEA3920968	ERR1352303	S	S	S	S	S	S	S	S	S	S	S	S	S
P02	Trauner et. al. 2017	ERR1352306	SAMEA3920971	ERR1352306	S	S	S	S	S	S	S	S	S	S	S	S	S
P03	Trauner et. al. 2017	ERR1352307	SAMEA3920972	ERR1352307	S	S	S	S	S	S	S	S	S	S	S	S	S
P03	Trauner et. al. 2017	ERR1352310	SAMEA3920975	ERR1352310	S	S	S	S	S	S	S	S	S	S	S	S	S
P04	Trauner et. al. 2017	ERR1352311	SAMEA3920976	ERR1352311	S	S	S	S	S	S	S	S	S	S	S	S	S
P04	Trauner et. al. 2017	ERR1352312	SAMEA3920977	ERR1352312	S	S	S	S	S	S	S	S	S	S	S	S	S
P05	Trauner et. al. 2017	ERR1352314	SAMEA3920979	ERR1352314	S	S	S	S	S	S	S	S	S	S	S	S	S
P05	Trauner et. al. 2017	ERR1352318	SAMEA3920983	ERR1352318	S	S	S	S	S	S	S	S	S	S	S	S	S
P06	Trauner et. al. 2017	ERR1352319	SAMEA3920984	ERR1352319	S	S	S	S	S	S	S	S	S	S	S	S	S
P06	Trauner et. al. 2017	ERR1352323	SAMEA3920988	ERR1352323	S	S	S	S	S	S	S	S	S	S	S	S	S
P07	Trauner et. al. 2017	ERR1352324	SAMEA3920989	ERR1352324	S	S	S	S	S	S	S	S	S	S	S	S	S
P07	Trauner et. al. 2017	ERR1352328	SAMEA3920993	ERR1352328	S	S	S	S	S	S	S	S	S	S	S	S	S
P08	Trauner et. al. 2017	ERR1352329	SAMEA3920994	ERR1352329	R	R	S	S	S	S	S	S	S	S	S	S	S
P08	Trauner et. al. 2017	ERR1352333	SAMEA3920998	ERR1352333	R	R	S	S	S	S	S	S	S	S	S	S	S
P09	Trauner et. al. 2017	ERR1352334	SAMEA3920999	ERR1352334	R	R	S	S	R	S	S	S	R	R	S	S	S
P09	Trauner et. al. 2017	ERR1352339	SAMEA3921004	ERR1352339	R	R	S	S	R	S	S	S	R	R	S	S	S
P10	Trauner et. al. 2017	ERR1352341	SAMEA3921006	ERR1352341	R	R	S	S	S	S	R	S	S	S	S	S	R
P10	Trauner et. al. 2017	ERR1352344	SAMEA3921009	ERR1352344	R	R	S	S	S	S	R	S	S	S	S	S	R
P11	Trauner et. al. 2017	ERR1352345	SAMEA3921010	ERR1352345	S	R	S	S	S	S	S	S	S	S	S	S	S
P11	Trauner et. al. 2017	ERR1352349	SAMEA3921014	ERR1352349	S	R	S	S	S	S	S	S	S	S	S	S	S
P12	Trauner et. al. 2017	ERR1352354	SAMEA3921019	ERR1352354	S	R	S	S	S	S	R	S	S	S	S	S	S
P12	Trauner et. al. 2017	ERR1352358	SAMEA3921023	ERR1352358	S	R	S	S	S	S	R	S	S	S	S	S	S
1	Witney et. al. 2017	ERR1750873	SAMEA23740168	ERR1750873	S	S	S	S	S	S	S	S	S	S	S	S	S
1	Witney et. al. 2017	ERR1750874	SAMEA23740918	ERR1750874	S	S	S	S	S	S	S	S	S	S	S	S	S
2	Witney et. al. 2017	ERR1750875	SAMEA23741668	ERR1750875	S	S	S	S	S	S	S	S	S	S	S	S	S
2	Witney et. al. 2017	ERR1750876	SAMEA23742418	ERR1750876	S	R	S	S	S	S	S	S	S	S	S	S	S
3	Witney et. al. 2017	ERR1750877	SAMEA23743168	ERR1750877	S	S	S	S	S	S	S	S	S	S	S	S	S
3	Witney et. al. 2017	ERR1750878	SAMEA23743918	ERR1750878	S	S	S	S	S	S	S	S	S	S	S	S	S
4	Witney et. al. 2017	ERR1750879	SAMEA23744668	ERR1750879	S	S	S	S	S	S	S	S	S	S	S	S	S
4	Witney et. al. 2017	ERR1750880	SAMEA23745418	ERR1750880	R	R	S	S	S	R	S	S	S	S	S	S	R
5	Witney et. al. 2017	ERR1750881	SAMEA23746168	ERR1750881	S	S	S	S	S	S	S	S	S	S	S	S	S
5	Witney et. al. 2017	ERR1750882	SAMEA23746918	ERR1750882	S	S	S	S	S	S	S	S	S	S	S	S	S
6	Witney et. al. 2017	ERR1750883	SAMEA23747668	ERR1750883	S	S	S	S	S	S	S	S	S	S	S	S	S
6	Witney et. al. 2017	ERR1750884	SAMEA23748418	ERR1750884	S	S	S	S	S	S	S	S	S	S	S	S	S
7	Witney et. al. 2017	ERR1750885	SAMEA23749168	ERR1750885	S	S	S	S	S	S	S	S	S	S	S	S	S
7	Witney et. al. 2017	ERR1750886	SAMEA23749918	ERR1750886	S	S	S	S	S	S	S	S	S	S	S	S	S
8	Witney et. al. 2017	ERR1750887	SAMEA23750668	ERR1750887	S	S	S	S	S	S	S	S	S	S	S	S	S
8	Witney et. al. 2017	ERR1750888	SAMEA23751418	ERR1750888	S	S	S	S	S	S	S	S	S	S	S	S	S
9	Witney et. al. 2017	ERR1750889	SAMEA23752168	ERR1750889	S	S	S	S	S	S	S	S	S	S	S	S	S
9	Witney et. al. 2017	ERR1750890	SAMEA23752918	ERR1750890	S	S	S	S	S	S	S	S	S	S	S	S	S
10	Witney et. al. 2017	ERR1750891	SAMEA23753668	ERR1750891	S	S	S	S	S	S	S	S	S	S	S	S	S
10	Witney et. al. 2017	ERR1750892	SAMEA23754418	ERR1750892	S	S	S	S	S	S	S	S	S	S	S	S	S
11	Witney et. al. 2017	ERR1750893	SAMEA23755168	ERR1750893	S	S	S	S	S	S	S	S	S	S	S	S	S
11	Witney et. al. 2017	ERR1750894	SAMEA23755918	ERR1750894	S	S	S	S	S	S	S	S	S	S	S	S	S
12	Witney et. al. 2017	ERR1750895	SAMEA23756668	ERR1750895	S	S	S	S	S	S	S	S	S	S	S	S	S
12	Witney et. al. 2017	ERR1750896	SAMEA23757418	ERR1750896	S	S	S	S	S	S	S	S	S	S	S	S	S
13	Witney et. al. 2017	ERR1750897	SAMEA23758168	ERR1750897	S	S	S	S	S	S	S	S	S	S	S	S	S
13	Witney et. al. 2017	ERR1750898	SAMEA23758918	ERR1750898	S	S	S	S	S	S	S	S	S	S	S	S	S
14	Witney et. al. 2017	ERR1750899	SAMEA23759668	ERR1750899	S	S	S	S	S	S	S	S	S	S	S	S	S
14	Witney et. al. 2017	ERR1750900	SAMEA23760418	ERR1750900	S	S	S	S	S	S	S	S	S	S	S	S	S
15	Witney et. al. 2017	ERR1750901	SAMEA23761168	ERR1750901	S	S	S	S	S	S	S	S	S	S	S	S	S
15	Witney et. al. 2017	ERR1750902	SAMEA23761918	ERR1750902	S	S	S	S	S	S	S	S	S	S	S	S	S
16	Witney et. al. 2017	ERR1750903	SAMEA23762668	ERR1750903	S	S	S	S	S	S	S	S	S	S	S	S	S
16	Witney et. al. 2017	ERR1750904	SAMEA23763418	ERR1750904	S	S	S	S	S	S	S	S	S	S	S	S	S
17	Witney et. al. 2017	ERR1750905	SAMEA23764168	ERR1750905	S	R	S	S	S	S	S	S	S	S	S	S	S
17	Witney et. al. 2017	ERR1750906	SAMEA23764918	ERR1750906	S	R	S	S	S	S	S	S	S	S	S	S	S
18	Witney et. al. 2017	ERR1750907	SAMEA23765668	ERR1750907	S	S	S	S	S	S	S	S	S	S	S	S	S
18	Witney et. al. 2017	ERR1750908	SAMEA23766418	ERR1750908	S	S	S	S	S	S	S	S	S	S	S	S	S
19	Witney et. al. 2017	ERR1750909	SAMEA23767168	ERR1750909	S	S	S	S	S	S	S	S	S	S	S	S	S
19	Witney et. al. 2017	ERR1750910	SAMEA23767918	ERR1750910	S	S	S	S	S	S	S	S	S	S	S	S	S
20	Witney et. al. 2017	ERR1750911	SAMEA23768668	ERR1750911	S	S	S	S	S	S	S	S	S	S	S	S	S
20	Witney et. al. 2017	ERR1750912	SAMEA23769418	ERR1750912	S	S	S	S	S	S	S	S	S	S	S	S	S
21	Witney et. al. 2017	ERR1750913	SAMEA23770168	ERR1750913	S	S	S	S	S	S	S	S	S	S	S	S	S
21	Witney et. al. 2017	ERR1750914	SAMEA23770918	ERR1750914	S	S	S	S	S	S	S	S	S	S	S	S	S
22	Witney et. al. 2017	ERR1750915	SAMEA23771668	ERR1750915	S	S	S	S	S	S	S	S	S	S	S	S	S
22	Witney et. al. 2017	ERR1750916	SAMEA23772418	ERR1750916	S	S	S	S	S	S	S	S	S	S	S	S	S
23	Witney et. al. 2017	ERR1750917	SAMEA23773168	ERR1750917	S	S	S	S	S	S	S	S	S	S	S	S	S
23	Witney et. al. 2017	ERR1750918	SAMEA23773918	ERR1750918	S	S	S	S	S	S	S	S	S	S	S	S	S
24	Witney et. al. 2017	ERR1750919	SAMEA23774668	ERR1750919	S	S	S	S	S	S	S	S	S	S	S	S	S
24	Witney et. al. 2017	ERR1750920	SAMEA23775418	ERR1750920	S	S	S	S	S	S	S	S	S	S	S	S	S
25	Witney et. al. 2017	ERR1750921	SAMEA23776168	ERR1750921	S	S	S	S	S	S	S	S	S	S	S	S	S
25	Witney et. al. 2017	ERR1750922	SAMEA23776918	ERR1750922	S	S	S	S	S	S	S	S	S	S	S	S	S
26	Witney et. al. 2017	ERR1750923	SAMEA23777668	ERR1750923	S	S	S	S	S	S	S	S	S	S	S	S	S
26	Witney et. al. 2017	ERR1750924	SAMEA23778418	ERR1750924	S	S	S	S	S	S	S	S	S	S	S	S	S
27	Witney et. al. 2017	ERR1750925	SAMEA23779168	ERR1750925	S	S	S	S	S	S	S	S	S	S	S	S	S
27	Witney et. al. 2017	ERR1750926	SAMEA23779918	ERR1750926	S	S	S	S	S	S	S	S	S	S	S	S	S
28	Witney et. al. 2017	ERR1750927	SAMEA23780668	ERR1750927	S	S	S	S	S	S	S	S	S	S	S	S	S
28	Witney et. al. 2017	ERR1750928	SAMEA23781418	ERR1750928	S	S	S	S	S	S	S	S	S	S	S	S	S
29	Witney et. al. 2017	ERR1750929	SAMEA23782168	ERR1750929	S	S	S	S	S	S	S	S	S	S	S	S	S
29	Witney et. al. 2017	ERR1750930	SAMEA23782918	ERR1750930	S	S	S	S	S	S	S	S	S	S	S	S	S
30	Witney et. al. 2017	ERR1750931	SAMEA23783668	ERR1750931	S	S	S	S	S	S	S	S	S	S	S	S	S
30	Witney et. al. 2017	ERR1750932	SAMEA23784418	ERR1750932	S	S	S	S	S	S	S	S	S	S	S	S	S
31	Witney et. al. 2017	ERR1750933	SAMEA23785168	ERR1750933	S	S	S	S	S	S	S	S	S	S	S	S	S
31	Witney et. al. 2017	ERR1750934	SAMEA23785918	ERR1750934	S	S	S	S	S	S	S	S	S	S	S	S	S
32	Witney et. al. 2017	ERR1750935	SAMEA23786668	ERR1750935	S	S	S	S	S	S	S	S	S	S	S	S	S
32	Witney et. al. 2017	ERR1750936	SAMEA23787418	ERR1750936	S	S	S	S	S	S	S	S	S	S	S	S	S
33	Witney et. al. 2017	ERR1750937	SAMEA23788168	ERR1750937	S	S	S	S	S	S	S	S	S	S	S	S	S
33	Witney et. al. 2017	ERR1750938	SAMEA23788918	ERR1750938	S	S	S	S	S	S	S	S	S	S	S	S	S
34	Witney et. al. 2017	ERR1750939	SAMEA23789668	ERR1750939	S	S	S	S	S	S	S	S	S	S	S	S	S
34	Witney et. al. 2017	ERR1750940	SAMEA23790418	ERR1750940	S	S	S	S	S	S	S	S	S	S	S	S	S
35	Witney et. al. 2017	ERR1750941	SAMEA23791168	ERR1750941	S	S	S	S	S	S	S	S	S	S	S	S	S
35	Witney et. al. 2017	ERR1750942	SAMEA23791918	ERR1750942	S	S	S	S	S	S	S	S	S	S	S	S	S
36	Witney et. al. 2017	ERR1750943	SAMEA23792668	ERR1750943	S	S	S	S	S	S	S	S	S	S	S	S	S
36	Witney et. al. 2017	ERR1750944	SAMEA23793418	ERR1750944	S	S	S	S	S	S	S	S	S	S	S	S	S
A	Xu et. al. 2018	SRR3742653	SAMN05328080	SRR3742653	S	R	S	S	S	R	R	S	S	S	S	S	S
A	Xu et. al. 2018	SRR3742665	SAMN05328084	SRR3742665	S	R	S	S	S	S	S	S	S	S	S	S	S
B	Xu et. al. 2018	SRR3742666	SAMN05328085	SRR3742666	S	S	S	S	S	S	S	S	S	S	S	S	S
B	Xu et. al. 2018	SRR3742668	SAMN05328087	SRR3742668	S	S	S	S	S	S	S	S	S	S	S	S	S
C	Xu et. al. 2018	SRR3742669	SAMN05328088	SRR3742669	R	R	S	S	S	S	R	S	S	S	S	S	S
C	Xu et. al. 2018	SRR3742657	SAMN05328092	SRR3742657	S	R	S	S	S	S	R	S	S	S	S	S	S
D	Xu et. al. 2018	SRR3742658	SAMN05328093	SRR3742658	R	R	S	S	S	R	S	S	S	S	S	S	R
D	Xu et. al. 2018	SRR3742662	SAMN05328097	SRR3742662	R	R	S	S	S	R	S	S	S	S	S	S	R
KPS_1	Guerra et. al. 2014	ERR182021		ERR182021	S	S	S	S	S	S	S	S	S	S	S	S	S
KPS_1	Guerra et. al. 2014	ERR181711		ERR181711	S	S	S	S	S	S	S	S	S	S	S	S	S
KPS_2	Guerra et. al. 2014	ERR212067		ERR212067	S	S	S	S	S	S	S	S	S	S	S	S	S
KPS_2	Guerra et. al. 2014	ERR773785		ERR773785	S	S	S	S	S	S	S	S	S	S	S	S	S
KPS_3	Guerra et. al. 2014	ERR212061		ERR212061	S	S	S	S	S	S	S	S	S	S	S	S	S
KPS_3	Guerra et. al. 2014	ERR212068		ERR212068	S	S	S	S	S	S	S	S	S	S	S	S	S
KPS_4	Guerra et. al. 2014	ERR190350		ERR190350	S	S	S	S	S	S	S	S	S	S	S	S	S
KPS_4	Guerra et. al. 2014	ERR163987		ERR163987	S	S	S	S	S	S	S	S	S	S	S	S	S
KPS_5	Guerra et. al. 2014	ERR037522		ERR037522	S	R	S	S	S	S	S	S	S	S	S	S	S
KPS_5	Guerra et. al. 2014	ERR212078		ERR212078	S	R	S	S	S	S	S	S	S	S	S	S	S
KPS_6	Guerra et. al. 2014	ERR036217		ERR036217	S	S	S	S	S	S	S	S	S	S	S	S	S
KPS_6	Guerra et. al. 2014	ERR176580		ERR176580	S	S	S	S	S	S	S	S	S	S	S	S	S
KPS_7	Guerra et. al. 2014	ERR161165		ERR161165	S	S	S	S	S	S	S	S	S	S	S	S	S
KPS_7	Guerra et. al. 2014	ERR161075		ERR161075	S	S	S	S	S	S	S	S	S	S	S	S	S
KPS_8	Guerra et. al. 2014	ERR245837		ERR245837	S	S	S	S	S	S	S	S	S	S	S	S	S
KPS_8	Guerra et. al. 2014	ERR181941		ERR181941	S	S	S	S	S	S	S	S	S	S	S	S	S
KPS_9	Guerra et. al. 2014	ERR245836		ERR245836	S	R	S	S	S	S	S	S	S	S	S	S	S
KPS_9	Guerra et. al. 2014	ERR212054		ERR212054	S	R	S	S	S	S	S	S	S	S	S	S	S
KPS_10	Guerra et. al. 2014	ERR036189		ERR036189	S	S	S	S	S	S	S	S	S	S	S	S	S
KPS_10	Guerra et. al. 2014	ERR163985		ERR163985	S	S	S	S	S	S	S	S	S	S	S	S	S
KPS_11	Guerra et. al. 2014	ERR216977		ERR216977	S	S	S	S	S	S	S	S	S	S	S	S	S
KPS_11	Guerra et. al. 2014	ERR473347		ERR473347	S	S	S	S	S	S	S	S	S	S	S	S	S
KPS_12	Guerra et. al. 2014	ERR036219		ERR036219	S	S	S	S	S	S	S	S	S	S	S	S	S
KPS_12	Guerra et. al. 2014	ERR245847		ERR245847	S	S	S	S	S	S	S	S	S	S	S	S	S
KPS_13	Guerra et. al. 2014	ERR212075		ERR212075	S	S	S	S	S	S	S	S	S	S	S	S	S
KPS_13	Guerra et. al. 2014	ERR221577		ERR221577	S	S	S	S	S	S	S	S	S	S	S	S	S
KPS_14	Guerra et. al. 2014	ERR190357		ERR190357	S	S	S	S	S	S	S	S	S	S	S	S	S
KPS_14	Guerra et. al. 2014	ERR176704		ERR176704	S	S	S	S	S	S	S	S	S	S	S	S	S
KPS_15	Guerra et. al. 2014	ERR221552		ERR221552	S	S	S	S	S	S	S	S	S	S	S	S	S
KPS_15	Guerra et. al. 2014	ERR161092		ERR161092	S	S	S	S	S	S	S	S	S	S	S	S	S
KPS_16	Guerra et. al. 2014	ERR212065		ERR212065	S	S	S	S	S	S	S	S	S	S	S	S	S
KPS_16	Guerra et. al. 2014	ERR212070		ERR212070	S	S	S	S	S	S	S	S	S	S	S	S	S
KPS_17	Guerra et. al. 2014	ERR245671		ERR245671	S	S	S	S	S	S	S	S	S	S	S	S	S
KPS_17	Guerra et. al. 2014	ERR181736		ERR181736	S	S	S	S	S	S	S	S	S	S	S	S	S
KPS_18	Guerra et. al. 2014	ERR037517		ERR037517	S	S	S	S	S	S	S	S	S	S	S	S	S
KPS_18	Guerra et. al. 2014	ERR181818		ERR181818	S	S	S	S	S	S	S	S	S	S	S	S	S
KPS_19	Guerra et. al. 2014	ERR176552		ERR176552	S	S	S	S	S	S	S	S	S	S	S	S	S
KPS_19	Guerra et. al. 2014	ERR212003		ERR212003	S	S	S	S	S	S	S	S	S	S	S	S	S
KPS_20	Guerra et. al. 2014	ERR163986		ERR163986	S	S	S	S	S	S	S	S	S	S	S	S	S
KPS_20	Guerra et. al. 2014	ERR182014		ERR182014	S	S	S	S	S	S	S	S	S	S	S	S	S
KPS_21	Guerra et. al. 2014	ERR181993		ERR181993	S	S	S	S	S	S	S	S	S	S	S	S	S
KPS_21	Guerra et. al. 2014	ERR212062		ERR212062	S	S	S	S	S	S	S	S	S	S	S	S	S
KPS_22	Guerra et. al. 2014	ERR163961		ERR163961	S	S	S	S	S	S	S	S	S	S	S	S	S
KPS_22	Guerra et. al. 2014	ERR181751		ERR181751	S	S	S	S	S	S	S	S	S	S	S	S	S
KPS_23	Guerra et. al. 2014	ERR212017		ERR212017	S	R	S	S	S	S	S	S	S	S	S	S	S
KPS_23	Guerra et. al. 2014	ERR245805		ERR245805	S	R	S	S	S	S	S	S	S	S	S	S	S
KPS_24	Guerra et. al. 2014	ERR245678		ERR245678	S	S	S	S	S	S	S	S	S	S	S	S	S
KPS_24	Guerra et. al. 2014	ERR216939		ERR216939	S	S	S	S	S	S	S	S	S	S	S	S	S
KPS_25	Guerra et. al. 2014	ERR181935		ERR181935	S	S	S	S	S	S	S	S	S	S	S	S	S
KPS_25	Guerra et. al. 2014	ERR245725		ERR245725	S	S	S	S	S	S	S	S	S	S	S	S	S
KPS_26	Guerra et. al. 2014	ERR126604		ERR126604	S	S	S	S	S	S	S	S	S	S	S	S	S
KPS_26	Guerra et. al. 2014	ERR212142		ERR212142	S	S	S	S	S	S	S	S	S	S	S	S	S
KPS_27	Guerra et. al. 2014	ERR245676		ERR245676	S	S	S	S	S	S	S	S	S	S	S	S	S
KPS_27	Guerra et. al. 2014	ERR181800		ERR181800	S	S	S	S	S	S	S	S	S	S	S	S	S
KPS_28	Guerra et. al. 2014	ERR161063		ERR161063	S	S	S	S	S	S	S	S	S	S	S	S	S
KPS_28	Guerra et. al. 2014	ERR181910		ERR181910	S	S	S	S	S	S	S	S	S	S	S	S	S
KPS_29	Guerra et. al. 2014	ERR176461		ERR176461	S	S	S	S	S	S	S	S	S	S	S	S	S
KPS_29	Guerra et. al. 2014	ERR163962		ERR163962	S	R	S	S	S	S	S	S	S	S	S	S	S
KPS_30	Guerra et. al. 2014	ERR176598		ERR176598	S	S	S	S	S	S	S	S	S	S	S	S	S
KPS_30	Guerra et. al. 2014	ERR126598		ERR126598	S	S	S	S	S	S	S	S	S	S	S	S	S
KPS_31	Guerra et. al. 2014	ERR176735		ERR176735	S	S	S	S	S	S	S	S	S	S	S	S	S
KPS_31	Guerra et. al. 2014	ERR773799		ERR773799	S	S	S	S	S	S	S	S	S	S	S	S	S
KPS_32	Guerra et. al. 2014	ERR212098		ERR212098	S	S	S	S	S	S	S	S	S	S	S	S	S
KPS_32	Guerra et. al. 2014	ERR163989		ERR163989	S	S	S	S	S	S	S	S	S	S	S	S	S
KPS_33	Guerra et. al. 2014	ERR176530		ERR176530	S	R	S	S	S	S	S	S	S	S	S	S	R
KPS_33	Guerra et. al. 2014	ERR323034		ERR323034	S	S	S	S	S	S	S	S	S	S	S	S	S
KPS_34	Guerra et. al. 2014	ERR212063		ERR212063	S	S	S	S	S	S	S	S	S	S	S	S	S
KPS_34	Guerra et. al. 2014	ERR245729		ERR245729	S	S	S	S	S	S	S	S	S	S	S	S	S
KPS_35	Guerra et. al. 2014	ERR036195		ERR036195	S	S	S	S	S	S	S	S	S	S	S	S	S
KPS_35	Guerra et. al. 2014	ERR037482		ERR037482	S	S	S	S	S	S	S	S	S	S	S	S	S
KPS_36	Guerra et. al. 2014	ERR176575		ERR176575	S	S	S	S	S	S	S	S	S	S	S	S	S
KPS_36	Guerra et. al. 2014	ERR176646		ERR176646	S	S	S	S	S	S	S	S	S	S	S	S	S
KPS_37	Guerra et. al. 2014	ERR161197		ERR161197	S	S	S	S	S	S	S	S	S	S	S	S	S
KPS_37	Guerra et. al. 2014	ERR221556		ERR221556	S	S	S	S	S	S	S	S	S	S	S	S	S
KPS_38	Guerra et. al. 2014	ERR245652		ERR245652	S	S	S	S	S	S	S	S	S	S	S	S	S
KPS_38	Guerra et. al. 2014	ERR182054		ERR182054	S	S	S	S	S	S	S	S	S	S	S	S	S
KPS_39	Guerra et. al. 2014	ERR037467		ERR037467	S	S	S	S	S	S	S	S	S	S	S	S	S
KPS_39	Guerra et. al. 2014	ERR473284		ERR473284	S	S	S	S	S	S	S	S	S	S	S	S	S
KPS_40	Guerra et. al. 2014	ERR245804		ERR245804	S	S	S	S	S	S	S	S	S	S	S	S	S
KPS_40	Guerra et. al. 2014	ERR181742		ERR181742	S	S	S	S	S	S	S	S	S	S	S	S	S
KPS_41	Guerra et. al. 2014	ERR176764		ERR176764	S	S	S	S	S	S	S	S	S	S	S	S	S
KPS_41	Guerra et. al. 2014	ERR176535		ERR176535	S	S	S	S	S	S	S	S	S	S	S	S	S
KPS_42	Guerra et. al. 2014	ERR036248		ERR036248	S	S	S	S	S	S	S	S	S	S	S	S	S
KPS_42	Guerra et. al. 2014	ERR221535		ERR221535	S	S	S	S	S	S	S	S	S	S	S	S	S
KPS_43	Guerra et. al. 2014	ERR211990		ERR211990	S	R	S	S	S	S	S	S	S	S	S	S	S
KPS_43	Guerra et. al. 2014	ERR181932		ERR181932	S	R	S	S	S	S	S	S	S	S	S	S	S
KPS_44	Guerra et. al. 2014	ERR036191		ERR036191	S	S	S	S	S	S	S	S	S	S	S	S	S
KPS_44	Guerra et. al. 2014	ERR176761		ERR176761	S	S	S	S	S	S	S	S	S	S	S	S	S
KPS_45	Guerra et. al. 2014	ERR212025		ERR212025	S	S	S	S	S	S	S	S	S	S	S	S	S
KPS_45	Guerra et. al. 2014	ERR212053		ERR212053	S	S	S	S	S	S	S	S	S	S	S	S	S
KPS_46	Guerra et. al. 2014	ERR176649		ERR176649	S	S	S	S	S	S	S	S	S	S	S	S	S
KPS_46	Guerra et. al. 2014	ERR190334		ERR190334	S	S	S	S	S	S	S	S	S	S	S	S	S
KPS_47	Guerra et. al. 2014	ERR736807		ERR736807	S	R	S	S	S	S	S	S	S	S	S	S	S
KPS_47	Guerra et. al. 2014	ERR736820		ERR736820	S	R	S	S	S	S	S	S	S	S	S	S	S
KPS_48	Guerra et. al. 2014	ERR245667		ERR245667	S	S	S	S	S	S	S	S	S	S	S	S	S
KPS_48	Guerra et. al. 2014	ERR161074		ERR161074	S	S	S	S	S	S	S	S	S	S	S	S	S
KPS_49	Guerra et. al. 2014	ERR176731		ERR176731	S	S	S	S	S	S	S	S	S	S	S	S	S
KPS_49	Guerra et. al. 2014	ERR176657		ERR176657	S	S	S	S	S	S	S	S	S	S	S	S	S
KPS_50	Guerra et. al. 2014	ERR181877		ERR181877	S	S	S	S	S	S	S	S	S	S	S	S	S
KPS_50	Guerra et. al. 2014	ERR245654		ERR245654	S	S	S	S	S	S	S	S	S	S	S	S	S
KPS_51	Guerra et. al. 2014	ERR176605		ERR176605	S	S	S	S	S	S	S	S	S	S	S	S	R
KPS_51	Guerra et. al. 2014	ERR176513		ERR176513	S	S	S	S	S	S	S	S	S	S	S	S	R
KPS_52	Guerra et. al. 2014	ERR037483		ERR037483	S	S	S	S	S	S	S	S	S	S	S	S	S
KPS_52	Guerra et. al. 2014	ERR212030		ERR212030	S	S	S	S	S	S	S	S	S	S	S	S	S
KPS_53	Guerra et. al. 2014	ERR221586		ERR221586	S	S	S	S	S	S	S	S	S	S	S	S	S
KPS_53	Guerra et. al. 2014	ERR221590		ERR221590	S	S	S	S	S	S	S	S	S	S	S	S	S
KPS_54	Guerra et. al. 2014	ERR245796		ERR245796	S	S	S	S	S	S	S	S	S	S	S	S	S
KPS_54	Guerra et. al. 2014	ERR181864		ERR181864	S	S	S	S	S	S	S	S	S	S	S	S	S
KPS_55	Guerra et. al. 2014	ERR323044		ERR323044	S	S	S	S	S	S	S	S	S	S	S	S	S
KPS_55	Guerra et. al. 2014	ERR181976		ERR181976	S	S	S	S	S	S	S	S	S	S	S	S	S
KPS_56	Guerra et. al. 2014	ERR245774		ERR245774	S	S	S	S	S	S	S	S	S	S	S	S	S
KPS_56	Guerra et. al. 2014	ERR181868		ERR181868	S	S	S	S	S	S	S	S	S	S	S	S	S
KPS_57	Guerra et. al. 2014	ERR245698		ERR245698	S	S	S	S	S	S	S	S	S	S	S	S	S
KPS_57	Guerra et. al. 2014	ERR126602		ERR126602	S	S	S	S	S	S	S	S	S	S	S	S	S
KPS_58	Guerra et. al. 2014	ERR182020		ERR182020	S	S	S	S	S	S	S	S	S	S	S	S	S
KPS_58	Guerra et. al. 2014	ERR181735		ERR181735	S	S	S	S	S	S	S	S	S	S	S	S	S
KPS_59	Guerra et. al. 2014	ERR164014		ERR164014	S	R	S	S	S	S	S	S	S	S	S	S	S
KPS_59	Guerra et. al. 2014	ERR473286		ERR473286	S	S	S	S	S	S	S	S	S	S	S	S	S
KPS_60	Guerra et. al. 2014	ERR176585		ERR176585	S	S	S	S	S	S	S	S	S	S	S	S	S
KPS_60	Guerra et. al. 2014	ERR190380		ERR190380	S	S	S	S	S	S	S	S	S	S	S	S	S
KPS_61	Guerra et. al. 2014	ERR036233		ERR036233	S	S	S	S	S	S	S	S	S	S	S	S	S
KPS_61	Guerra et. al. 2014	ERR176757		ERR176757	S	S	S	S	S	S	S	S	S	S	S	S	S
KPS_62	Guerra et. al. 2014	ERR245702		ERR245702	S	S	S	S	S	S	S	S	S	S	S	S	S
KPS_62	Guerra et. al. 2014	ERR181854		ERR181854	S	S	S	S	S	S	S	S	S	S	S	S	S
KPS_63	Guerra et. al. 2014	ERR176729		ERR176729	S	S	S	S	S	S	S	S	S	S	S	S	S
KPS_63	Guerra et. al. 2014	ERR181857		ERR181857	S	S	S	S	S	S	S	S	S	S	S	S	S
KPS_64	Guerra et. al. 2014	ERR176638		ERR176638	S	S	S	S	S	S	S	S	S	S	S	S	S
KPS_64	Guerra et. al. 2014	ERR181965		ERR181965	S	S	S	S	S	S	S	S	S	S	S	S	S
KPS_65	Guerra et. al. 2014	ERR161198		ERR161198	S	S	S	S	S	S	S	S	S	S	S	S	S
KPS_65	Guerra et. al. 2014	ERR161099		ERR161099	S	S	S	S	S	S	S	S	S	S	S	S	S
KPS_66	Guerra et. al. 2014	ERR161106		ERR161106	S	S	S	S	S	S	S	S	S	S	S	S	S
KPS_66	Guerra et. al. 2014	ERR181971		ERR181971	S	S	S	S	S	S	S	S	S	S	S	S	S
KPS_67	Guerra et. al. 2014	ERR181680		ERR181680	S	R	S	S	S	S	S	S	S	S	S	S	S
KPS_67	Guerra et. al. 2014	ERR216962		ERR216962	S	S	S	S	S	S	S	S	S	S	S	S	S
KPS_68	Guerra et. al. 2014	ERR176472		ERR176472	S	S	S	S	S	S	S	S	S	S	S	S	S
KPS_68	Guerra et. al. 2014	ERR181875		ERR181875	S	S	S	S	S	S	S	S	S	S	S	S	S
KPS_69	Guerra et. al. 2014	ERR181867		ERR181867	S	S	S	S	S	S	S	S	S	S	S	S	S
KPS_69	Guerra et. al. 2014	ERR176717		ERR176717	S	S	S	S	S	S	S	S	S	S	S	S	S
KPS_70	Guerra et. al. 2014	ERR176623		ERR176623	S	S	S	S	S	S	S	S	S	S	S	S	S
KPS_70	Guerra et. al. 2014	ERR176794		ERR176794	S	S	S	S	S	S	S	S	S	S	S	S	S
KPS_71	Guerra et. al. 2014	ERR176471		ERR176471	S	S	S	S	S	S	S	S	S	S	S	S	S
KPS_71	Guerra et. al. 2014	ERR212007		ERR212007	S	S	S	S	S	S	S	S	S	S	S	S	S
KPS_72	Guerra et. al. 2014	ERR176787		ERR176787	S	S	S	S	S	S	S	S	S	S	S	S	S
KPS_72	Guerra et. al. 2014	ERR161155		ERR161155	S	S	S	S	S	S	S	S	S	S	S	S	S
KPS_73	Guerra et. al. 2014	ERR212090		ERR212090	S	S	S	S	S	S	S	S	S	S	S	S	S
KPS_73	Guerra et. al. 2014	ERR323049		ERR323049	S	S	S	S	S	S	S	S	S	S	S	S	S
KPS_74	Guerra et. al. 2014	ERR181956		ERR181956	S	R	S	S	S	S	S	S	S	S	S	S	S
KPS_74	Guerra et. al. 2014	ERR161043		ERR161043	S	R	S	S	S	S	S	S	S	S	S	S	S
KPS_75	Guerra et. al. 2014	ERR221543		ERR221543	S	S	S	S	S	S	S	S	S	S	S	S	S
KPS_75	Guerra et. al. 2014	ERR161117		ERR161117	S	S	S	S	S	S	S	S	S	S	S	S	S
KPS_76	Guerra et. al. 2014	ERR216899		ERR216899	S	S	S	S	S	S	S	S	S	S	S	S	S
KPS_76	Guerra et. al. 2014	ERR181940		ERR181940	S	S	S	S	S	S	S	S	S	S	S	S	S
KPS_77	Guerra et. al. 2014	ERR221551		ERR221551	S	S	S	S	S	S	S	S	S	S	S	S	S
KPS_77	Guerra et. al. 2014	ERR182011		ERR182011	S	S	S	S	S	S	S	S	S	S	S	S	S
KPS_78	Guerra et. al. 2014	ERR161069		ERR161069	S	S	S	S	S	S	S	S	S	S	S	S	S
KPS_78	Guerra et. al. 2014	ERR126634		ERR126634	S	S	S	S	S	S	S	S	S	S	S	S	S
KPS_79	Guerra et. al. 2014	ERR176457		ERR176457	S	S	S	S	S	S	S	S	S	S	S	S	S
KPS_79	Guerra et. al. 2014	ERR181776		ERR181776	S	S	S	S	S	S	S	S	S	S	S	S	S
KPS_80	Guerra et. al. 2014	ERR182056		ERR182056	S	S	S	S	S	S	S	S	S	S	S	S	S
KPS_80	Guerra et. al. 2014	ERR124649		ERR124649	S	S	S	S	S	S	S	S	S	S	S	S	S
KPS_81	Guerra et. al. 2014	ERR182044		ERR182044	S	S	S	S	S	S	S	S	S	S	S	S	S
KPS_81	Guerra et. al. 2014	ERR181715		ERR181715	S	S	S	S	S	S	S	S	S	S	S	S	S
KPS_82	Guerra et. al. 2014	ERR181713		ERR181713	S	S	S	S	S	S	S	S	S	S	S	S	S
KPS_82	Guerra et. al. 2014	ERR181852		ERR181852	S	S	S	S	S	S	S	S	S	S	S	S	S
KPS_83	Guerra et. al. 2014	ERR181827		ERR181827	S	S	S	S	S	S	S	S	S	S	S	S	S
KPS_83	Guerra et. al. 2014	ERR212156		ERR212156	S	S	S	S	S	S	S	S	S	S	S	S	S
KPS_84	Guerra et. al. 2014	ERR473307		ERR473307	S	R	S	S	S	S	S	S	S	S	S	S	R
KPS_84	Guerra et. al. 2014	ERR736847		ERR736847	S	R	S	S	S	S	S	S	S	S	S	S	R
2014W	Bryant et. al. 2013	ERR108127	300239	ERR108127	S	R	S	S	S	S	S	S	S	S	S	S	S
2014W	Bryant et. al. 2013	ERR108128	301725	ERR108128	S	S	S	S	S	S	S	S	S	S	S	S	S
3117W	Bryant et. al. 2013	ERR108155	300798	ERR108155	S	S	S	S	S	S	S	S	S	S	S	S	S
3117W	Bryant et. al. 2013	ERR108156	301816	ERR108156	S	S	S	S	S	S	S	S	S	S	S	S	S
3129J	Bryant et. al. 2013	ERR108157	301310	ERR108157	S	S	S	S	S	S	S	S	S	S	S	S	S
3129J	Bryant et. al. 2013	ERR108158	302203	ERR108158	S	S	S	S	S	S	S	S	S	S	S	S	S
3157Q	Bryant et. al. 2013	ERR966620	301645	ERR966620	S	S	S	S	S	S	S	S	S	S	S	S	S
3157Q	Bryant et. al. 2013	ERR108168	302434	ERR108168	S	S	S	S	S	S	S	S	S	S	S	S	S
4023C	Bryant et. al. 2013	ERR108171	300234	ERR108171	S	S	S	S	S	S	S	S	S	S	S	S	S
4023C	Bryant et. al. 2013	ERR108172	301747	ERR108172	S	S	S	S	S	S	S	S	S	S	S	S	S
4024R	Bryant et. al. 2013	ERR108173	300260	ERR108173	S	S	S	S	S	S	S	S	S	S	S	S	S
4024R	Bryant et. al. 2013	ERR108174	302174	ERR108174	S	S	S	S	S	S	S	S	S	S	S	S	S
3142P	Bryant et. al. 2013	ERR108159	400958	ERR108159	S	S	S	S	S	S	S	S	S	S	S	S	S
3142P	Bryant et. al. 2013	ERR108160	402629	ERR108160	S	S	S	S	S	S	S	S	S	S	S	S	S
3143B	Bryant et. al. 2013	ERR108161	400968	ERR108161	S	S	S	S	S	S	S	S	S	S	S	S	S
3143B	Bryant et. al. 2013	ERR108162	402431	ERR108162	S	S	S	S	S	S	S	S	S	S	S	S	S
3018C	Bryant et. al. 2013	ERR108143	300191	ERR108143	S	S	S	S	S	S	S	S	S	S	S	S	S
3018C	Bryant et. al. 2013	ERR108144	302235	ERR108144	S	S	S	S	S	S	S	S	S	S	S	S	S
4137X	Bryant et. al. 2013	ERR108175	300879	ERR108175	S	R	S	S	S	S	S	S	S	S	S	S	S
4137X	Bryant et. al. 2013	ERR108176	302258	ERR108176	S	R	S	S	S	S	S	S	S	S	S	S	S
4146V	Bryant et. al. 2013	ERR108179	400834	ERR108179	S	R	S	S	S	S	S	S	S	S	S	S	S
4146V	Bryant et. al. 2013	ERR108180	402321	ERR108180	S	R	S	S	S	S	S	S	S	S	S	S	S
4241M	Bryant et. al. 2013	ERR108185	401539	ERR108185	S	S	S	S	S	S	S	S	S	S	S	S	S
4241M	Bryant et. al. 2013	ERR108186	402495	ERR108186	S	S	S	S	S	S	S	S	S	S	S	S	S
2028K	Bryant et. al. 2013	ERR108133	400711	ERR108133	S	S	S	S	S	S	S	S	S	S	S	S	S
2028K	Bryant et. al. 2013	ERR108134	401787	ERR108134	S	S	S	S	S	S	S	S	S	S	S	S	S
2047T	Bryant et. al. 2013	ERR966621	401063	ERR966621	S	S	S	S	S	S	S	S	S	S	S	S	S
2047T	Bryant et. al. 2013	ERR108140	402106	ERR108140	S	S	S	S	S	S	S	S	S	S	S	S	S
3147D	Bryant et. al. 2013	ERR108164	401107	ERR108164	S	S	S	S	S	S	S	S	S	S	S	S	S
3147D	Bryant et. al. 2013	ERR108163	402538	ERR108163	S	S	S	S	S	S	S	S	S	S	S	S	S
4144U	Bryant et. al. 2013	ERR108177	400731	ERR108177	S	S	S	S	S	S	S	S	S	S	S	S	S
4144U	Bryant et. al. 2013	ERR108178	402248	ERR108178	S	S	S	S	S	S	S	S	S	S	S	S	S
3162L	Bryant et. al. 2013	ERR171166	401391	ERR171166	S	R	S	S	S	S	S	S	S	S	S	S	S
3162L	Bryant et. al. 2013	ERR171167	402713	ERR171167	S	S	S	S	S	S	S	S	S	S	S	S	S
3061R	Bryant et. al. 2013	ERR108149	400541	ERR108149	S	S	S	S	S	S	S	S	S	S	S	S	S
3061R	Bryant et. al. 2013	ERR108150	402138	ERR108150	S	S	S	S	S	S	S	S	S	S	S	S	S
2043R	Bryant et. al. 2013	ERR108137	400739	ERR108137	S	S	S	S	S	S	S	S	S	S	S	S	S
2043R	Bryant et. al. 2013	ERR108138	402267	ERR108138	S	S	S	S	S	S	S	S	S	S	S	S	S
4154E	Bryant et. al. 2013	ERR108181	301092	ERR108181	S	S	S	S	S	S	S	S	S	S	S	S	S
4154E	Bryant et. al. 2013	ERR108182	302350	ERR108182	S	S	S	S	S	S	S	S	S	S	S	S	S
5017Y	Bryant et. al. 2013	ERR171128	200105	ERR171128	S	S	S	S	S	S	S	S	S	S	S	S	S
5017Y	Bryant et. al. 2013	ERR171129	201009	ERR171129	S	S	S	S	S	S	S	S	S	S	S	S	S
4084F	Bryant et. al. 2013	ERR171130	200353	ERR171130	R	S	S	S	S	S	S	S	S	S	S	S	S
4084F	Bryant et. al. 2013	ERR171131	201404	ERR171131	R	S	S	S	S	S	S	S	S	S	S	S	S
4068M	Bryant et. al. 2013	ERR171132	200135	ERR171132	S	R	S	S	S	S	S	S	S	S	S	S	S
4068M	Bryant et. al. 2013	ERR171133	201150	ERR171133	S	R	S	S	S	S	S	S	S	S	S	S	S
2027W	Bryant et. al. 2013	ERR108131	400673	ERR108131	S	S	S	S	S	S	S	S	S	S	S	S	S
2027W	Bryant et. al. 2013	ERR108132	402568	ERR108132	S	S	S	S	S	S	S	S	S	S	S	S	S
3149E	Bryant et. al. 2013	ERR108165	401325	ERR108165	S	S	S	S	S	S	S	S	S	S	S	S	S
3149E	Bryant et. al. 2013	ERR108166	402797	ERR108166	S	S	S	S	S	S	S	S	S	S	S	S	S
4161B	Bryant et. al. 2013	ERR108183	401243	ERR108183	S	S	S	S	S	S	S	S	S	S	S	S	S
4161B	Bryant et. al. 2013	ERR108184	402251	ERR108184	S	S	S	S	S	S	S	S	S	S	S	S	S
2041Q	Bryant et. al. 2013	ERR108135	301347	ERR108135	S	S	S	S	S	S	S	S	S	S	S	S	S
2041Q	Bryant et. al. 2013	ERR108136	302226	ERR108136	S	S	S	S	S	S	S	S	S	S	S	S	S
2050N	Bryant et. al. 2013	ERR108141	401555	ERR108141	S	S	S	S	S	S	S	S	S	S	S	S	S
2050N	Bryant et. al. 2013	ERR108142	402542	ERR108142	S	S	S	S	S	S	S	S	S	S	S	S	S
2030R	Bryant et. al. 2013	ERR171134	200625	ERR171134	S	S	S	S	S	S	S	S	S	S	S	S	S
2030R	Bryant et. al. 2013	ERR171135	201035	ERR171135	S	S	S	S	S	S	S	S	S	S	S	S	S
4085U	Bryant et. al. 2013	ERR171136	200470	ERR171136	S	S	S	S	S	S	S	S	S	S	S	S	S
4085U	Bryant et. al. 2013	ERR171137	201113	ERR171137	S	S	S	S	S	S	S	S	S	S	S	S	S
4098U	Bryant et. al. 2013	ERR171138	200541	ERR171138	S	S	S	S	S	S	S	S	S	S	S	S	S
4098U	Bryant et. al. 2013	ERR171139	201314	ERR171139	S	S	S	S	S	S	S	S	S	S	S	S	S
4078X	Bryant et. al. 2013	ERR966619	200253	ERR966619	S	S	S	S	S	S	S	S	S	S	S	S	S
4078X	Bryant et. al. 2013	ERR171141	201366	ERR171141	S	S	S	S	S	S	S	S	S	S	S	S	S
4069Z	Bryant et. al. 2013	ERR171142	200127	ERR171142	S	S	S	S	S	S	S	S	S	S	S	S	S
4069Z	Bryant et. al. 2013	ERR171143	201457	ERR171143	S	S	S	S	S	S	S	S	S	S	S	S	S
3100U	Bryant et. al. 2013	ERR108152	300659	ERR108152	S	S	S	S	S	S	S	S	S	S	S	S	S
3100U	Bryant et. al. 2013	ERR108151	302642	ERR108151	S	S	S	S	S	S	S	S	S	S	S	S	S
2020E	Bryant et. al. 2013	ERR108130	400044	ERR108130	S	S	S	S	S	S	S	S	S	S	S	S	S
2020E	Bryant et. al. 2013	ERR108129	401206	ERR108129	S	S	S	S	S	S	S	S	S	S	S	S	S
3047X	Bryant et. al. 2013	ERR108146	400260	ERR108146	S	S	S	S	S	S	S	S	S	S	S	S	S
3047X	Bryant et. al. 2013	ERR108145	401212	ERR108145	S	S	S	S	S	S	S	S	S	S	S	S	S
3103J	Bryant et. al. 2013	ERR108154	400554	ERR108154	S	S	S	S	S	S	S	S	S	S	S	S	S
3103J	Bryant et. al. 2013	ERR108153	401594	ERR108153	S	S	S	S	S	S	S	S	S	S	S	S	S
3058W	Bryant et. al. 2013	ERR108148	400491	ERR108148	S	S	S	S	S	S	S	S	S	S	S	S	S
3058W	Bryant et. al. 2013	ERR108147	402206	ERR108147	S	S	S	S	S	S	S	S	S	S	S	S	S
1020A	Bryant et. al. 2013	ERR108126	400285	ERR108126	S	S	S	S	S	S	S	S	S	S	S	S	S
1020A	Bryant et. al. 2013	ERR108125	401416	ERR108125	S	S	S	S	S	S	S	S	S	S	S	S	S
4063W	Bryant et. al. 2013	ERR171144	200066	ERR171144	S	S	S	S	S	S	S	S	S	S	S	S	S
4063W	Bryant et. al. 2013	ERR171145	201127	ERR171145	S	S	S	S	S	S	S	S	S	S	S	S	S
1117N	Bryant et. al. 2013	ERR171154	1500283	ERR171154	S	S	S	S	S	S	S	S	S	S	S	S	S
1117N	Bryant et. al. 2013	ERR171155	1500034	ERR171155	S	S	S	S	S	S	S	S	S	S	S	S	S
3582J	Bryant et. al. 2013	ERR171156	1500435	ERR171156	S	S	S	S	S	S	S	S	S	S	S	S	S
3582J	Bryant et. al. 2013	ERR171157	1500108	ERR171157	S	S	S	S	S	S	S	S	S	S	S	S	S
3644X	Bryant et. al. 2013	ERR171158	1500524	ERR171158	S	S	S	S	S	S	S	S	S	S	S	S	S
3644X	Bryant et. al. 2013	ERR171159	1500176	ERR171159	S	S	S	S	S	S	S	S	S	S	S	S	S
